# Supplementary material for: Anti-plasmodial action of de novo-designed, cationic, lysine-branched, amphipathic, helical peptides
Source: Malar J. 2012 Aug 1;11:256. doi: 10.1186/1475-2875-11-256 (PMC3502156; doi:10.1186/1475-2875-11-256)

## **Additional File 9.**

### **Method**

#### **Immunohistochemical Fluorescence staining of MSP3 in $\Delta$ Fd treated Trophozoite and Schizont cultures.**

To probe mechanistic details of  $\Delta$ Fd-mediated, premature parasite egress, *P. falciparum* 3D7 culture (2% parasitaemia, 2% haematocrit) was incubated without (control) or with  $\Delta$ Fd (2.5  $\mu$ M) at 37°C for 6 hr in a final volume of 100  $\mu$ l made with RPMI (96  $\mu$ l RPMI + 4  $\mu$ l peptide solution). Smears were processed as follows: (a) flooded with 2% BSA/PBS (1 hr, 37°C), (b) PBS washed and (c) flooded (1 hr, 37°C) with polyclonal anti-MSP3 antibody produced in mouse (1: 100 dilution in 1% BSA/PBS), (d) PBS washed and (e) flooded with alexa fluor 488 labelled anti-mouse antibody (Sigma) (1: 500 dilution in 1% BSA/PBS, 1 hr, 37°C in dark), (e) PBS washed and (f) flooded with DAPI (4, 6-diamidino-2-phenylindole) (invitrogen) (500 ng/ml, 10 min, 37°C). After a final PBS wash the smears were observed under Nikon eclipse fluorescence microscope using appropriate filters.

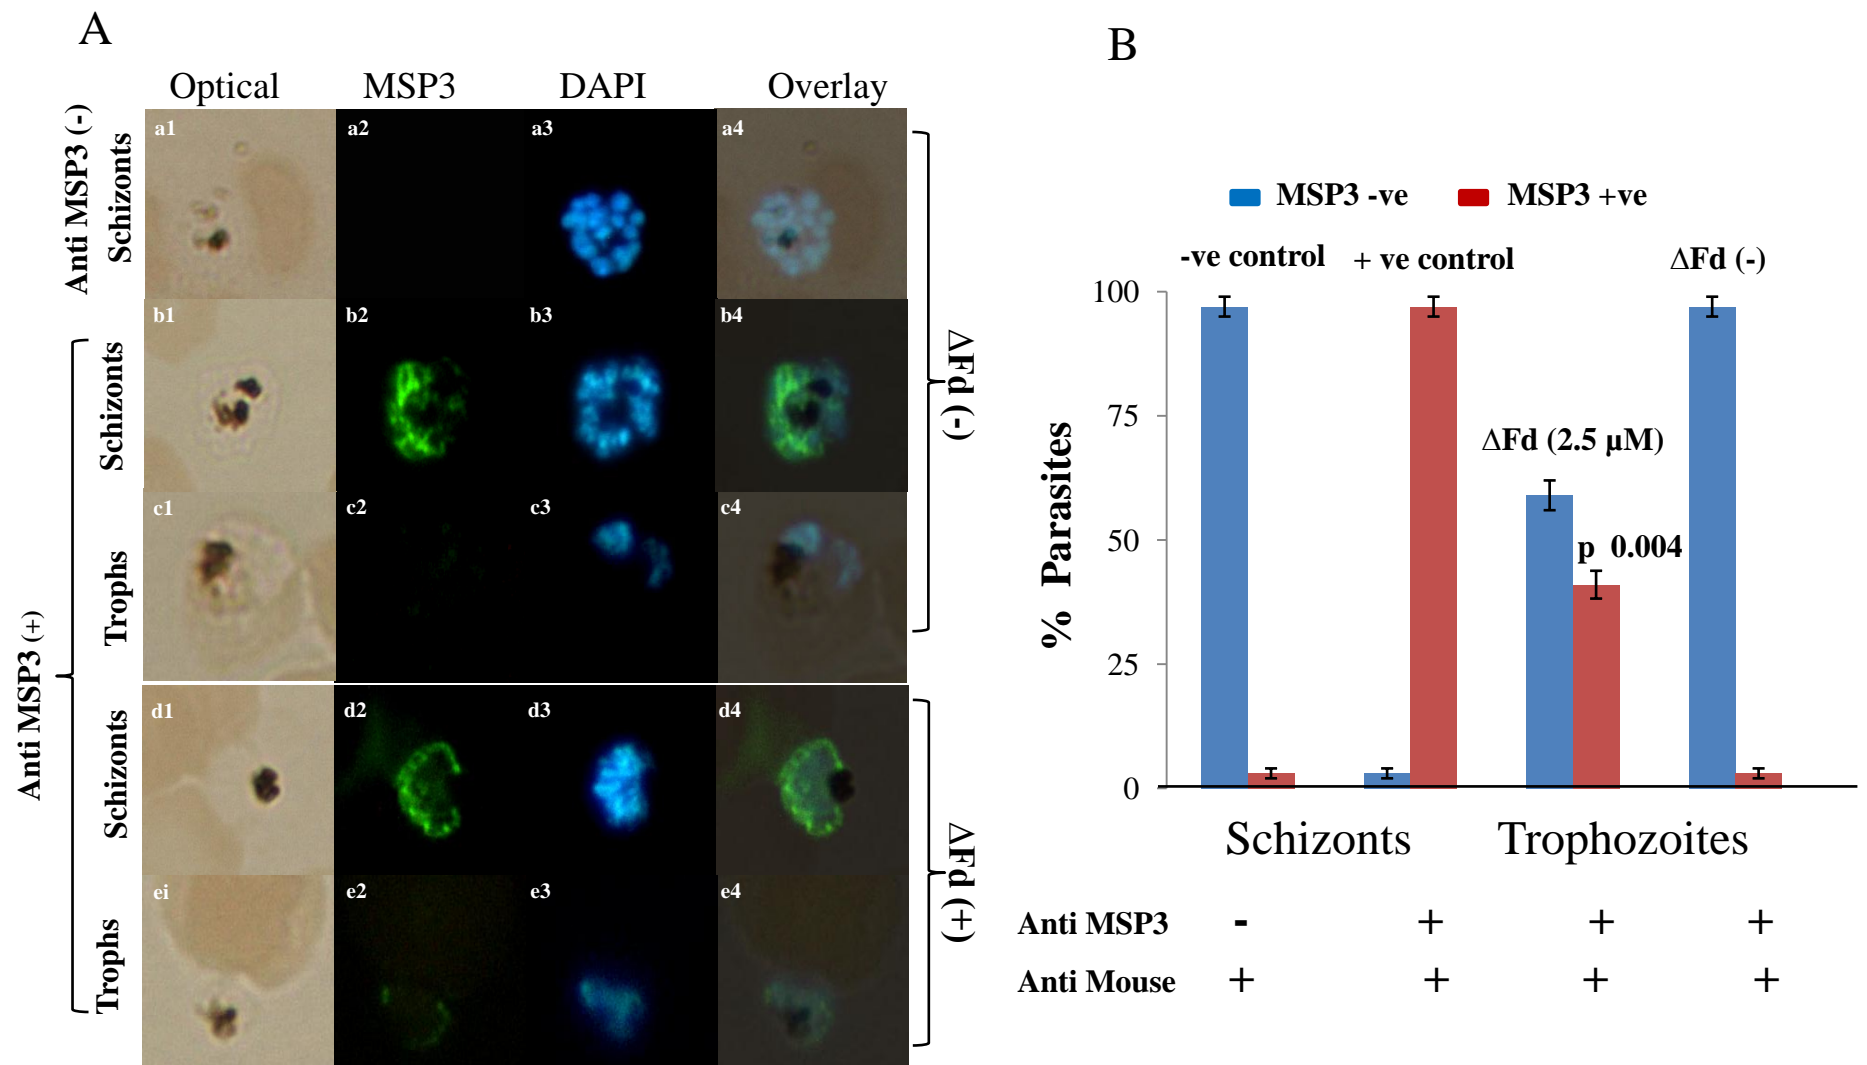

Supplement: Additional file 9 — ΔFd treated schizonts express MSP3. [file 1475-2875-11-256-S9.pdf]
